# Supplementary material for: An Evaluation Method for the Suppression of Pathogenic Fusarium oxysporum by Soil Microorganisms Using the Dilution Plate Technique
Source: PubMed Central journal article supplement (PMC5017808; doi:10.1264/jsme2.me16052), 2016-08-24
Supplement: 31_307_s1.pdf [file 31_307_s1.pdf]

1 Table S1. Chemical characteristics of soil used in experiments in the present study<sup>a</sup>

|                                                                               | Experiment 1 | Experiment 2 | Experiment 3 |
|-------------------------------------------------------------------------------|--------------|--------------|--------------|
| pH (H <sub>2</sub> O)                                                         | 6.86         | 5.95         | 7.09         |
| EC (dS m <sup>-1</sup> )                                                      | 0.11         | 0.12         | 0.08         |
| NH <sub>3</sub> -N (mg kg <sup>-1</sup> )                                     | 8.5          | 6.7          | 9.5          |
| NO <sub>3</sub> -N (mg kg <sup>-1</sup> )                                     | 14.8         | 26.9         | 7.4          |
| Available P (P <sub>2</sub> O <sub>5</sub> mg kg <sup>-1</sup> ) <sup>b</sup> | 1,940        | 20           | 30           |
| Exchangeable K (K <sub>2</sub> O mg kg <sup>-1</sup> )                        | 490          | 280          | 300          |
| Exchangeable Ca (CaO mg kg <sup>-1</sup> )                                    | 3,980        | 3,310        | 3,040        |
| Exchangeable Mg (MgO mg kg <sup>-1</sup> )                                    | 680          | 540          | 770          |
| Phosphate absorption coefficient                                              | 2565         | 2824         | 2662         |
| CEC (cmol <sub>c</sub> kg <sup>-1</sup> )                                     | 22.2         | 27.7         | 20.8         |

2 <sup>a</sup> pH and EC were measured in moist soil and the other characteristics were measured in air-dried soil.

3 <sup>b</sup> Truog method.

**Fig. S1** Growth of spinach on June 17, 2015. Cont, compound inorganic fertilizer; MI10, microbial inoculant applied with 10,000 kg ha<sup>-1</sup>.

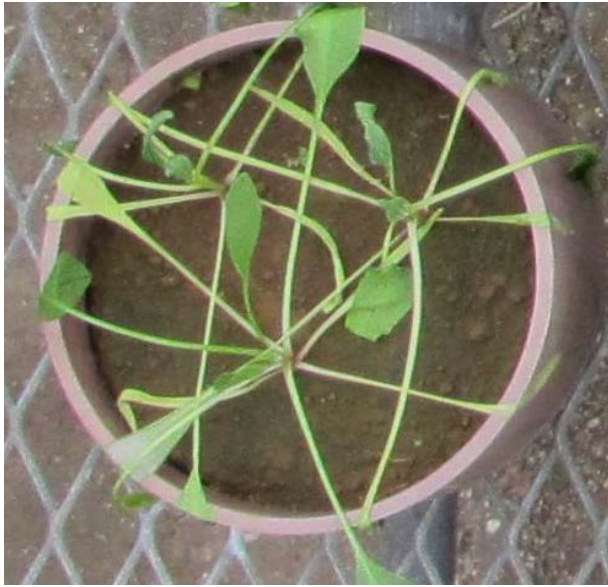

Cont

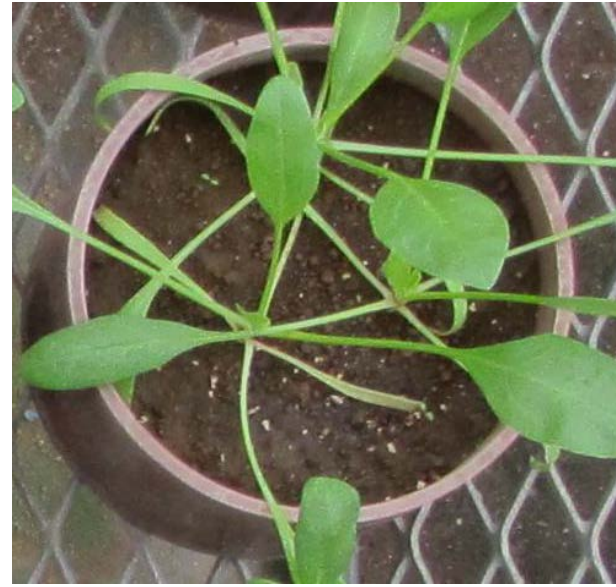

MI10

Fig. S1 Mitsuboshi
